CORRECTION

# Correction: Association between Physical Activity Knowledge and Levels of Physical Activity in Chinese Adults with Type 2 Diabetes

The *PLOS ONE* Staff

There are errors in Questions 1–3 in [Table 2](#), “Proportions of different answers in each physical activity knowledge question.” Please see the corrected [Table 2](#) here. The publisher apologizes for these errors.

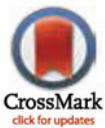

## OPEN ACCESS

**Citation:** The *PLOS ONE* Staff (2015) Correction: Association between Physical Activity Knowledge and Levels of Physical Activity in Chinese Adults with Type 2 Diabetes. *PLoS ONE* 10(4): e0124701. doi:10.1371/journal.pone.0124701

**Published:** April 7, 2015

**Copyright:** © 2015 The PLOS ONE Staff. This is an open access article distributed under the terms of the [Creative Commons Attribution License](#), which permits unrestricted use, distribution, and reproduction in any medium, provided the original author and source are credited.

**Table 2. Proportions of different answers in each physical activity knowledge question.**

| Questions <sup>a</sup>                                                                                                              | Answers            |                       |                         |
|-------------------------------------------------------------------------------------------------------------------------------------|--------------------|-----------------------|-------------------------|
|                                                                                                                                     | Agree <i>n</i> (%) | Disagree <i>n</i> (%) | Don't know <i>n</i> (%) |
| 1. Ten minutes of physical activity three times per day provide the same health benefits as a single session of 30 minutes. (T)     | 134 (51.9)         | 84 (32.6)             | 40 (15.5)               |
| 2. Patients with Type 2 diabetes should get 30 minutes of moderate physical activity most days of the week. (T)                     | 201 (77.9)         | 26 (10.1)             | 31 (12.0)               |
| 3. Vigorous levels of physical activity are necessary to provide health benefits. (F)                                               | 193 (74.8)         | 41 (15.9)             | 24 (9.3)                |
| 4. Patients with Type 2 diabetes should be physically active at least 5 days a week. (T)                                            | 187 (72.5)         | 37 (14.3)             | 34 (13.2)               |
| 5. Patients with Type 2 diabetes should avoid exercising in the evening. (T)                                                        | 50 (19.4)          | 142 (55.0)            | 66 (25.6)               |
| 6. Regular exercise or being physically active helps to control your diabetes. (T)                                                  | 234 (90.7)         | 12 (4.7)              | 12 (4.7)                |
| 7. Patients with Type 2 diabetes should have resistance training that involves all major muscle groups. (T)                         | 90 (34.9)          | 92 (35.7)             | 76 (29.5)               |
| 8. Resistance training can improve insulin resistance and increase insulin sensitivity. (T)                                         | 87 (33.7)          | 66 (25.6)             | 105 (40.7)              |
| 9. Greater health benefits can be achieved by increasing the amount (duration, frequency, or intensity) of physical activities. (T) | 143 (55.4)         | 82 (31.8)             | 33 (12.8)               |
| 10. Performing physical activities only on weekends is enough to achieve health benefits. (F)                                       | 200 (77.5)         | 35 (13.6)             | 23 (8.9)                |
| 11. Performing vigorous physical activities for 3 hours once a week is enough to experience health benefits. (F)                    | 204 (79.1)         | 24 (9.3)              | 30 (11.6)               |
| 12. Which of the following physical activities do you believe will provide health benefits?                                         |                    |                       |                         |
| a. aerobics class (T)                                                                                                               | 198 (76.7)         | 31 (12.0)             | 29 (11.2)               |
| b. biking (T)                                                                                                                       | 220 (85.3)         | 17 (6.6)              | 21 (8.1)                |
| c. dancing (T)                                                                                                                      | 182 (70.5)         | 44 (17.1)             | 32 (12.4)               |
| d. household cleaning (T)                                                                                                           | 175 (61.8)         | 60 (23.3)             | 23 (8.9)                |
| e. jogging/running (T)                                                                                                              | 218 (84.5)         | 26 (10.1)             | 14 (5.4)                |
| f. playing a musical instrument (F)                                                                                                 | 148 (57.4)         | 63 (24.4)             | 47 (18.2)               |
| g. preparing meals (F)                                                                                                              | 124 (48.1)         | 97 (37.6)             | 37 (14.3)               |
| h. swimming (T)                                                                                                                     | 222 (86.0)         | 19 (7.4)              | 17 (6.6)                |
| i. weightlifting (T)                                                                                                                | 105 (40.7)         | 115 (44.6)            | 38 (14.7)               |

<sup>a</sup>. T for true; F for false

doi:10.1371/journal.pone.0124701.t001

## Reference

1. Hui SS-C, Hui GP-S, Xie YJ (2014) Association between Physical Activity Knowledge and Levels of Physical Activity in Chinese Adults with Type 2 Diabetes. PLoS ONE 9(12): e115098. doi: [10.1371/journal.pone.0115098](https://doi.org/10.1371/journal.pone.0115098) PMID: [25493559](https://pubmed.ncbi.nlm.nih.gov/25493559/)
